# Supplementary material
Source: PubMed Central journal article supplement (PMC4178640)
Supplement: AEM.02280-14_zam999105704so1.pdf [file AEM.02280-14_zam999105704so1.pdf]

Supplemental material for

**A Transmembrane Protein Responsible for Subtilomycin Immunity, ApnI, Unveils a Novel Model for Lantibiotic Immunity**

Yun Deng, Cong-Zhi Li, Yi-Guang Zhu, Peng-Xia Wang, Jing-Jing, Fu, Qing-Dong Qi, Dong-Hai Peng, Li-Fang Ruan, and Ming Sun\*

\*Correspondence should be addressed to Ming Sun at

State Key Laboratory of Agricultural Microbiology,

College of Life Science and Technology,

Huazhong Agricultural University,

Wuhan 430070, People's Republic of China

E-mail: [m98sun@mail.hzau.edu.cn](mailto:m98sun@mail.hzau.edu.cn)

Tel: (+86) 27 87283455, Fax: (+86) 27 87280670

**This file includes:**

**Supporting Table S1 to S2**

**Supporting Figure S1 to Figure S4 and Legends**

**Supporting References**

Table S1 Comparison of the fragments obtained from MS/MS of the 3234.48 Da peptide and the theoretical mass of predicted subtilomycin\*

| Residues of core peptide | Measured m/z      | Calculated mass | Theoretical mass | Difference (Da) |
|--------------------------|-------------------|-----------------|------------------|-----------------|
| 1-32                     | 1079.1658 y32(3+) | 3234.474        | 3234.4806        | 0.0066          |
| 1-4                      | 425.1804 b4(+)    | 425.1804        | 425.1828         | 0.0024          |
| 1-5                      | 538.2646 b5(+)    | 538.2646        | 538.2668         | 0.0022          |
| 6-32                     | 1349.6148 y27(2+) | 2697.214        | 2697.2217        | 0.0077          |
| 1-2                      | 271.1079 b2(+)    | 271.1079        | 271.1086         | 0.0007          |
| 1-4                      | 342.1439 b3(+)    | 342.1439        | 342.1457         | 0.0018          |
| 32-32                    | 133.0598 y1(+)    | 132.052         | 132.0536         | 0.0016          |
| 10-32                    | 1158.9991 y23(2+) | 2315.9826       | 2315.9841        | 0.0015          |
| 1-8                      | 806.4182 b8(+)    | 806.4182        | 806.4203         | 0.0021          |
| 4-32                     | 965.4426 y29(3+)  | 2893.3044       | 2893.3428        | 0.0384          |
| 8-32                     | 1257.0624 y25(2+) | 2512.1092       | 2512.1053        | -0.0039         |
| 1-9                      | 919.5036 b9(+)    | 919.5036        | 919.5044         | 0.0008          |
| 9-32                     | 1215.5418 y24(2+) | 2429.068        | 2429.0682        | 0.0002          |
| 5-32                     | 1406.1535 y28(2+) | 2810.2914       | 2810.3058        | 0.0144          |
| 2-32                     | 1051.151 y31(3+)  | 3150.4296       | 3150.4593        | 0.0297          |
| 1-31                     | 1552.1953 b31(2+) | 3103.3828       | 3103.4350        | 0.0522          |

\*The fragments are listed as ions in descending order of intensity

Table S2 The location of ApnI-like immunity proteins-encoding genes in the genome of the corresponding produce strains

| Gene cluster           | Location in available genome (GenBank Accession <sup>a</sup> ) | Produce strain                  | ApnI-like proteins (GenBank Accession) | Coverage and Similarity to ApnI (%) | Identity to ApnI (%) | Identity to ApnA (%) |
|------------------------|----------------------------------------------------------------|---------------------------------|----------------------------------------|-------------------------------------|----------------------|----------------------|
| subtilomycin           | 202,000-211,369 bp ( CP007409.1 )                              | <i>B.subtilis</i> OH 131.1      | SubI AID00391.1                        | 100, 100                            | 100                  | 100                  |
| subtilomycin           | 1-11,100 bp (JX912247.1)                                       | <i>B.subtilis</i> MMA7          | SubI AGL93175.1                        | 100, 100                            | 100                  | 100                  |
| Putative paenibacillin | 125,106-139,135 bp in contig129 (AIPP01000129.1)               | <i>P. polymyxa</i> OSY-DF       | PaeI AFS60104.1                        | 72, 55                              | 27                   | 47                   |
| Putative paenibacillin | 123,569-136,380 bp in contig14 (AFOX01000014.1)                | <i>P. polymyxa</i> ATCC 842     | NA                                     | 72, 55                              | 27                   | 47                   |
| Putative paenibacillin | 135,495-149,256 bp in contig7 (AMQU01000007.1)                 | <i>Paenibacillus</i> ICGEB2008  | NA                                     | 72, 55                              | 27                   | 47                   |
| Putative lantibiotic   | 124,141-134,856 bp (CP004135.1)                                | <i>B. thuringiensis</i> IS5056  | AGG04945.1                             | 90, 48                              | 29                   | 56-58                |
| Putative lantibiotic   | 1-7,780 bp in contig00361 (ACNA01000175.1)                     | <i>B. thuringiensis</i> T01001  | EEM31619.1                             | 90, 48                              | 29                   | 50-56                |
| Putative lantibiotic   | 1-7,870 bp in contig00246 (ACNK01000131.1)                     | <i>B. thuringiensis</i> IBL200  | EEM95177.1                             | 90, 48                              | 24                   | 50-56                |
| Putative lantibiotic   | 1-7,800 bp in contig00015 (ACNF01000121.1)                     | <i>B. thuringiensis</i> 10792   | EEM62998.1                             | 90, 48                              | 29                   | 54-56                |
| Putative lantibiotic   | 10,000-19,500 bp in contig000035 (ARXZ02000035.1)              | <i>B. thuringiensis</i> T01-328 | ERH97312.1                             | 90, 48                              | 29                   | 54-56                |
| Putative lantibiotic   | 10,000-18,388 bp (AHCQ01000073.1)                              | <i>B. cereus</i> BAG1X1-1       | EOO24724.1                             | 90, 48                              | 29                   | 50-56                |
| Putative lantibiotic   | 1-8,000 bp (AHCT01000096.1)                                    | <i>B. cereus</i> BAG1X2-1       | EOO43056.1                             | 90, 48                              | 29                   | 50-56                |
| Putative lantibiotic   | 1-8,800 bp (AHCU01000046.1)                                    | <i>B. cereus</i> BAG1X2-2       | EOO46413.1                             | 90, 48                              | 29                   | 50-56                |
| Putative lantibiotic   | 10,000-18,422 bp (AHCV01000030.1)                              | <i>B. cereus</i> BAG1X2-3       | EOO61970.1                             | 90, 48                              | 29                   | 50-56                |
| Putative lantibiotic   | 10,000-19,500 bp (AHCW01000050.1)                              | <i>B. cereus</i> BAG2O-1        | EOP01400.1                             | 90, 48                              | 29                   | 50-56                |

a. Results are from GenBank nucleotide database in June 2014.

1

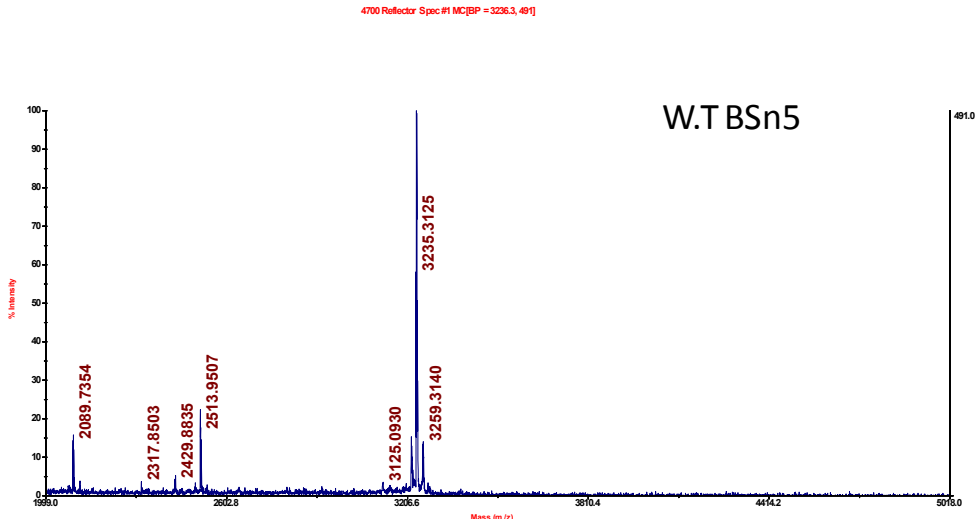

2

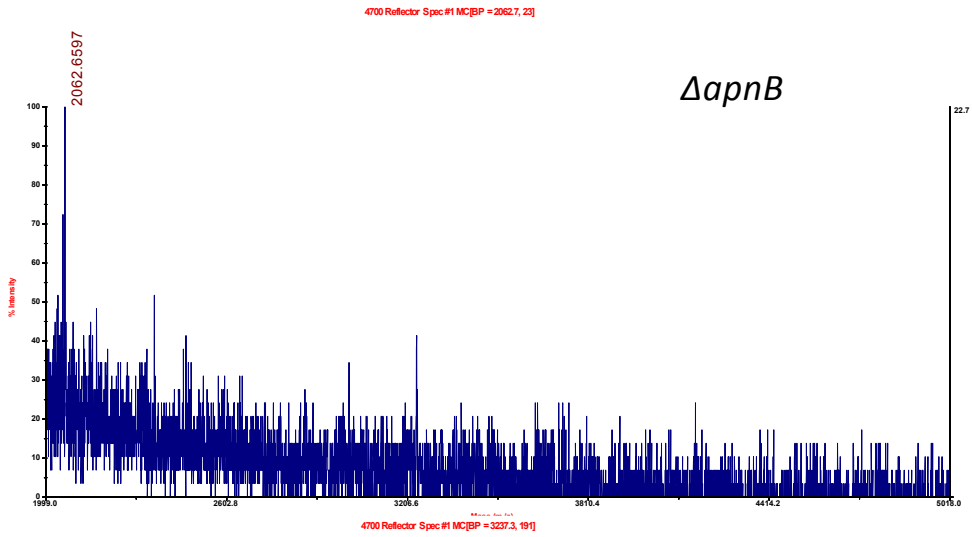

3

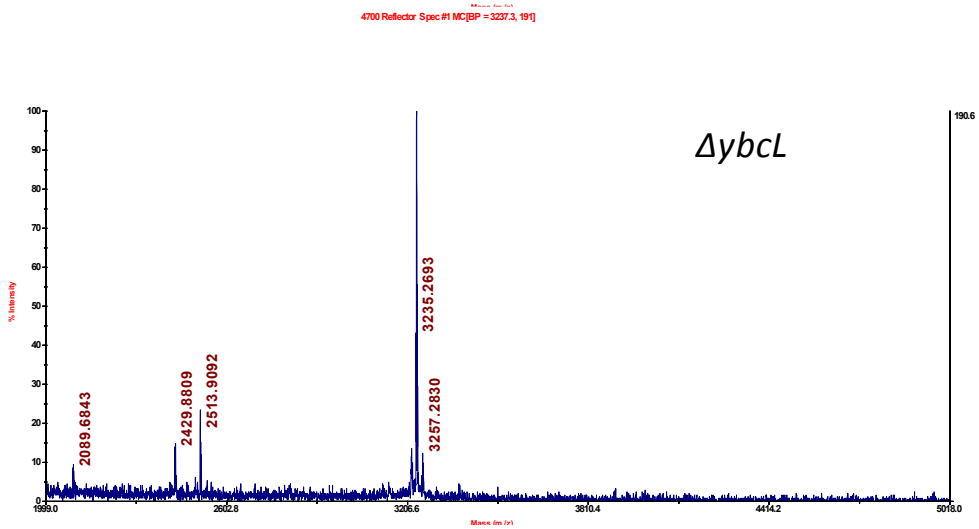

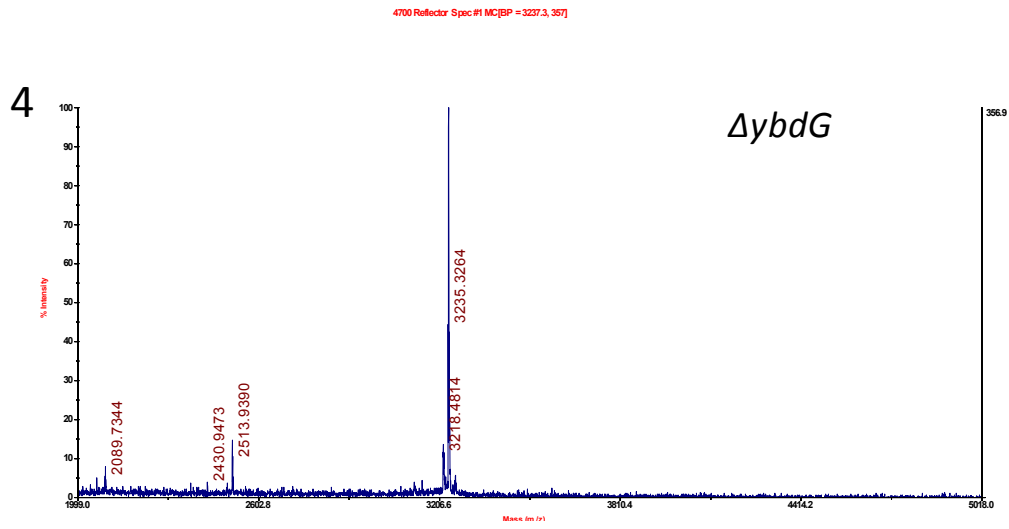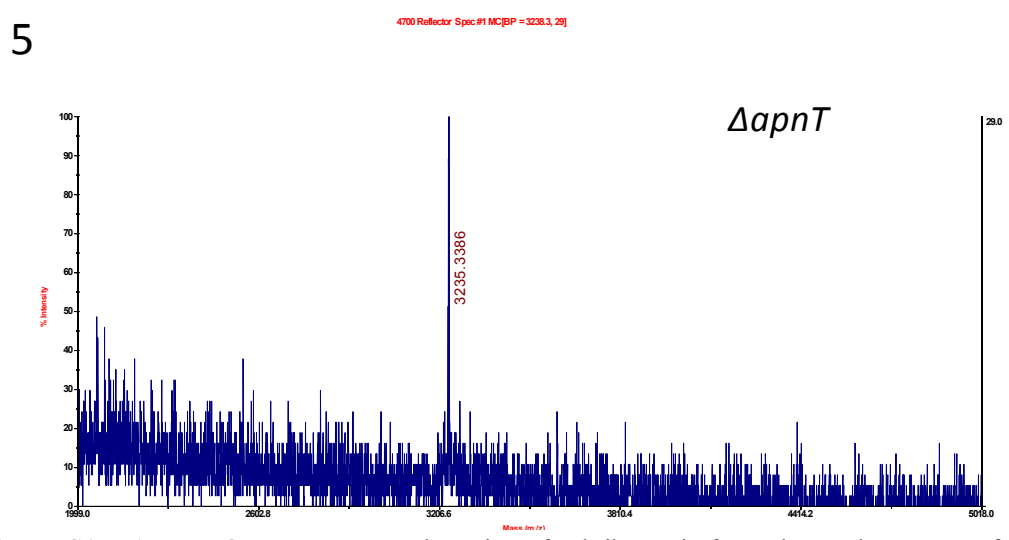

Figure. S1 MALDI-TOF mass spectra detection of subtilomycin from the crude extracts of wild type strain BSn5 and mutants. (1) Wild type strain BSn5 (2) mutant *ΔapnB* (3) mutant *ΔybcL* (4) mutant *ΔybdG* (5) mutant *ΔapnT*. The black ring refers to the respective target peaks of subtilomycin in MALDI-TOF spectrum. BP indicates Base Peak.

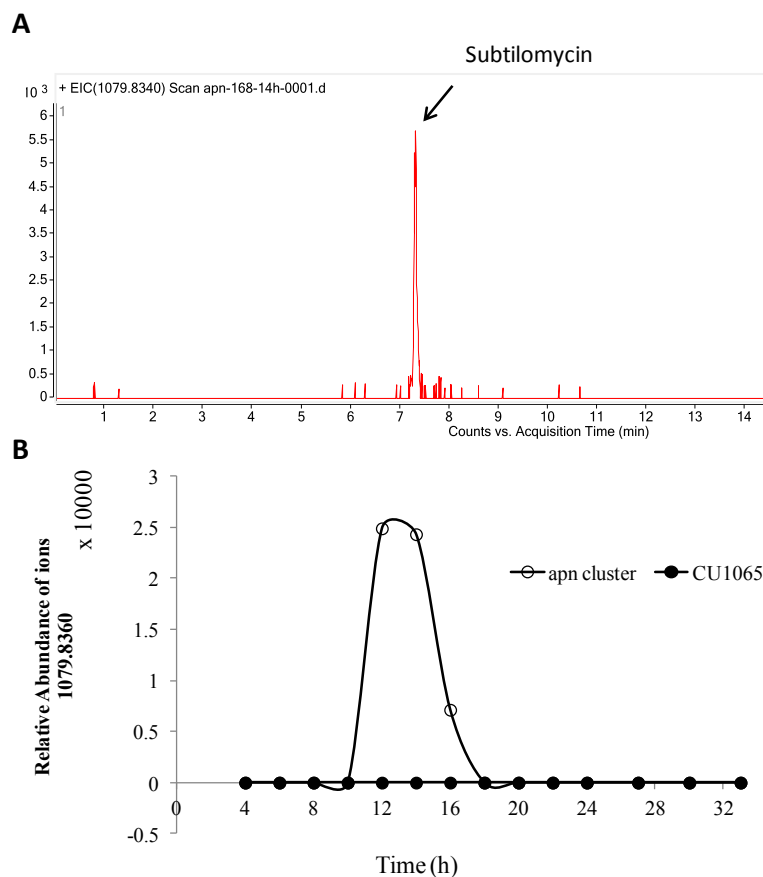

Figure. S2 Detection the production of subtilomycin from the supernatant of the recombinant with subtilomycin cluster integrated into *B.subtilis* CU1065 chromosome by high resolution LC-ESI-MS. (A) The extracted ions chromatography (EIC) of ions  $[M+3H]^{3+}$  1079.8338 m/z, which is indicated as subtilomycin. (B) Detection the ions 1079.8338 in supernatant of CU1065 and *apn* cluster recombinant during the different culture times.

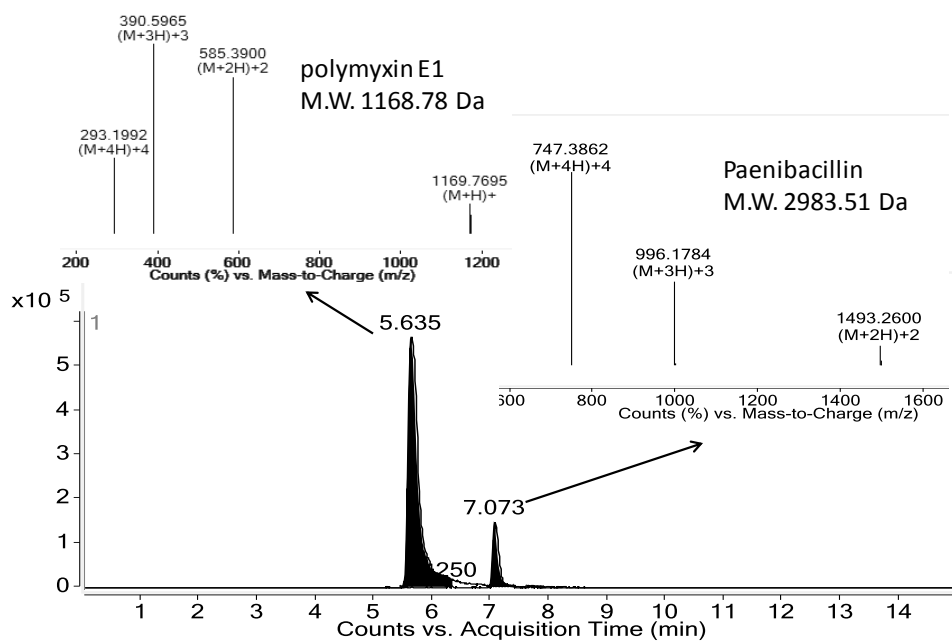

Figure. S3 The detection of paenibacillin production in crude extracts of *Paenibacillus* ATCC 842 by high resolution LC-ESI-MS. (Two compounds that have been identified from a crude extract of *Paenibacillus polymyxa* OSY-DF culture supernatant as polymyxin E1 and paenibacillin (1) were detected from a crude extract of *Paenibacillus* ATCC 842 culture supernatant. )

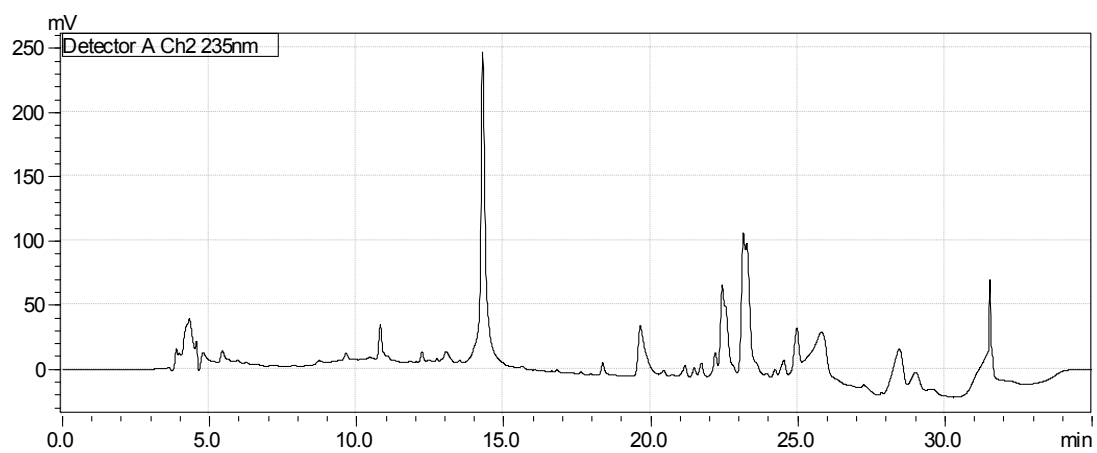

Figure. S4 Preparation RP-HPLC purification of the subtilomycin present in ammonium sulphate crude extracts (ASCE) from 12 h LB cultures of BSn5. (retention time, 14.3 min/45% acetonitrile)



1. **He Z, Kisa D, Zhang L, Yuan C, Green-Church KB, Yousef AE.** 2007. Isolation and identification of a *Paenibacillus polymyxa* strain that coproduces a novel lantibiotic and polymyxin. *Appl Environ Microbiol* **73**:168-178.
